# Supplementary material
Source: PubMed Central journal article supplement (PMC2259047)
Supplement: plntphys_pp.107.110544_1.pdf [file plntphys_pp.107.110544_1.pdf]

Supplemental Figure S1

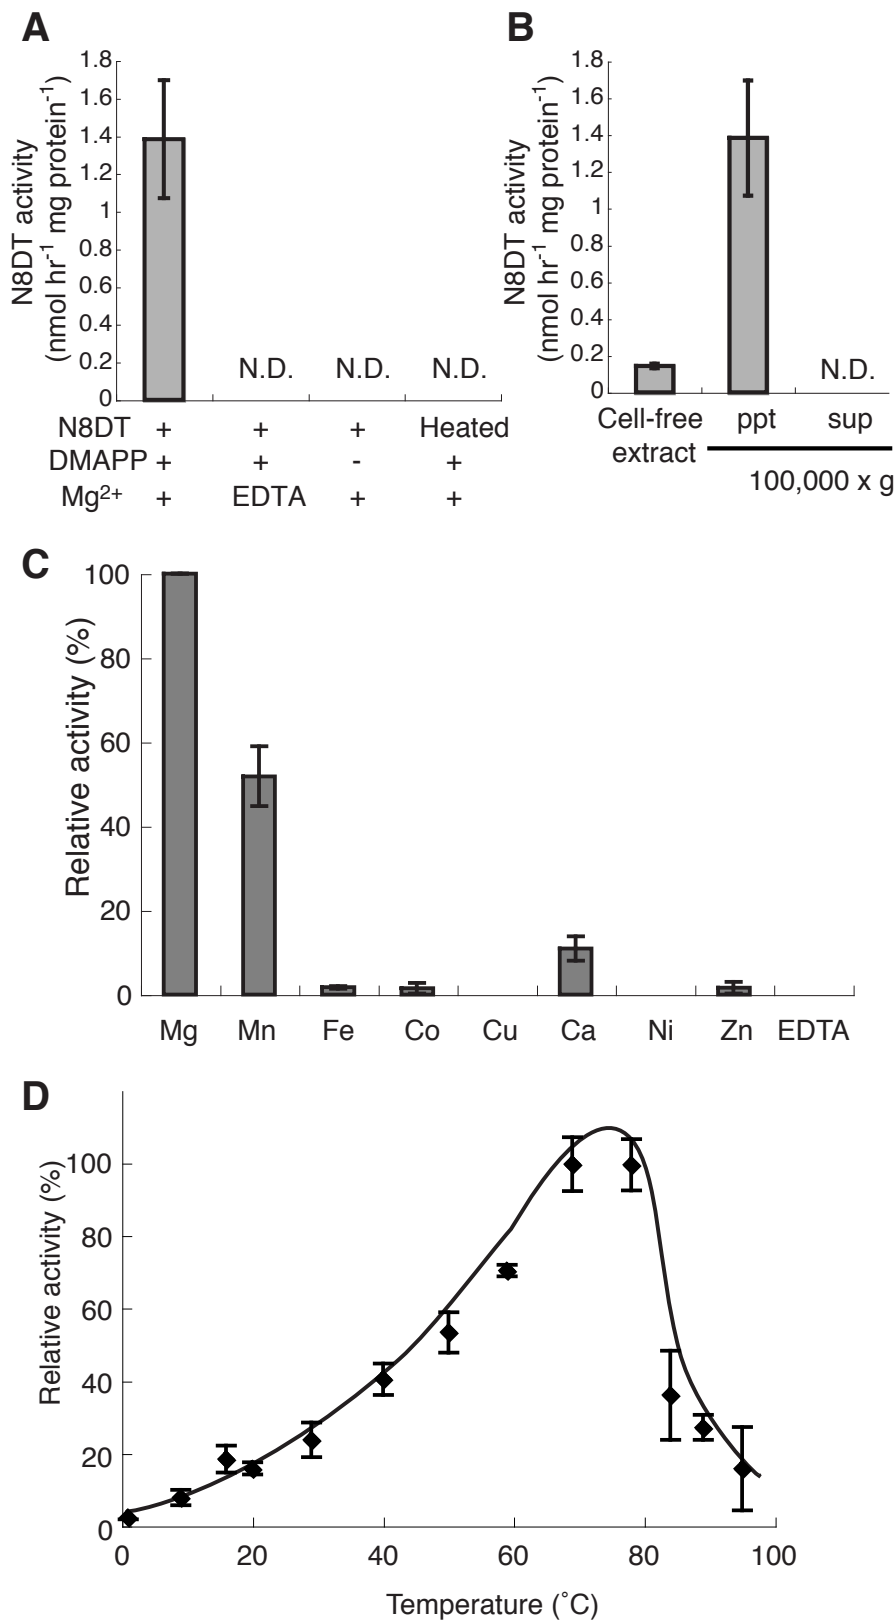

Fig. S1 Enzymatic characterization of recombinant SfN8DT-1 expressed in yeast.  
 (A) Dependency of N8DT activity on Mg<sup>2+</sup> and DMAPP.  
 (B) Separation of N8DT activity in the microsomal fraction from the soluble fraction.  
 (C) Divalent cation requirement.  
 (D) Temperature dependency.  
 N. D., not detected.
