# Supplementary material
Source: PubMed Central journal article supplement (PMC2259047)
Supplement: plntphys_pp.107.110544_2.pdf [file plntphys_pp.107.110544_2.pdf]

Supplemental Figure S2

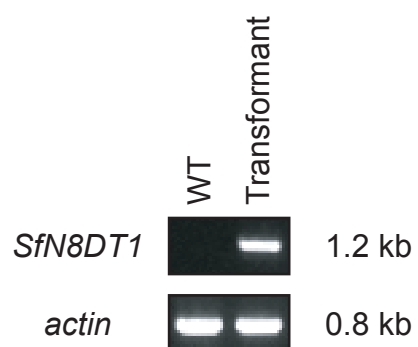

Fig. S2 Detection of *SfN8DT-1* mRNA in transgenic *Arabidopsis* plants. Total RNA prepared from T<sub>2</sub> seedlings were subjected to RT-PCR.
